# Supplementary material
Source: publisher site journal article supplement (https://www.dovepress.com/article/159732)
Supplement: Supplementary file 1 [file get_supplementary_file.php]

**Indacaterol/glycopyrronium reduces the risk of clinically important deterioration after direct switch from baseline therapies in patients with moderate COPD: a post hoc analysis of the CRYSTAL study**

Timm Greulich<sup>1</sup>, Konstantinos Kostikas<sup>2</sup>, Mina Gaga<sup>3</sup>, Maryam Aalamian-Mattheis<sup>2</sup>, Nadine Lossi<sup>4</sup>, Francesco Patalano<sup>2</sup>, Xavier Nunez<sup>5</sup>, Veronica A. Pagano<sup>5</sup>, Robert Fogel<sup>6</sup>, Claus F. Vogelmeier<sup>1\*</sup>; Andreas Clemens<sup>2,7\*</sup>

<sup>1</sup>University Medical Center Giessen and Marburg, Member of the German Center for Lung Research (DZL), Marburg, Germany; <sup>2</sup>Novartis Pharma AG, Basel, Switzerland; <sup>3</sup>7th Respiratory Medicine Department, Athens Chest Hospital Sotiria, Athens, Greece; <sup>4</sup>Novartis Pharma GmbH, Nürnberg, Germany; <sup>5</sup>TFS Develop, Barcelona, Spain; <sup>6</sup>Novartis Pharmaceuticals Corporation, East Hanover, NJ, United States; <sup>7</sup>Heart Center Freiburg University, Cardiology and Angiology I, Faculty of Medicine, Freiburg, Germany

\*Contributed equally

**Corresponding Author:**

Dr. med. Timm Greulich

University Medical Center Giessen and Marburg

Member of the German Center for Lung Research (DZL), Marburg, Germany

Tel: 06421/58-65078

Email: [greulich@med.uni-marburg.de](mailto:greulich@med.uni-marburg.de)

### S1.1. Inclusion criteria

1. Patients who have signed an informed consent form before any assessment is performed
2. Men and women aged  $\geq 40$  years
3. Patients with moderate COPD according to the Global Initiative for Chronic Obstructive Lung Disease (GOLD) criteria, 2013
4. Current or ex-smokers who have a smoking history of at least 10 pack-years
5. Patients with airflow limitation indicated by a post-bronchodilator forced expiratory volume in 1 second ( $FEV_1$ )  $\geq 50\%$  and  $< 80\%$  of the predicted normal value and a post-bronchodilator  $FEV_1$ /forced vital capacity (FVC)  $< 0.7$  at Visit 2 (between Day -7 to Day 1)
6. Patients who have been on a stable dose of one of the following COPD baseline treatments for at least 3 months at Visit 1 (Day -30):
  - a. Any short-acting  $\beta_2$ -agonist (SABA) monotherapy (such as, but not limited to, salbutamol),
  - b. Any short-acting muscarinic antagonist (SAMA) monotherapy (such as, but not limited to, ipratropium),
  - c. Any SABA and SAMA in free or fixed-dose combination (FDC; such as, but not limited to, salbutamol/ipratropium),
  - d. Any long-acting  $\beta_2$ -agonist (LABA) monotherapy (such as, but not limited to, formoterol, salmeterol or indacaterol),
  - e. Any long-acting muscarinic antagonist (LAMA) monotherapy (such as, but not limited to, tiotropium or aclidinium) except glycopyrronium bromide or

- f. Any LABA and inhaled corticosteroid (ICS) in free (such as, but not limited to, beclomethasone or fluticasone) or FDC (such as, but not limited to, salmeterol/fluticasone or formoterol/budesonide)
- 7. Patients with a modified Medical Research Council (mMRC) score  $\geq 1$  at Visit 1 (Day -30)

**S1.2. Exclusion criteria**

- 8. Patients with conditions contraindicated for treatment with or those with a history of reactions/hypersensitivity to any of the following inhalational drugs or to drugs of similar chemical classes or any component thereof: anti-cholinergic agents, long- and short-acting  $\beta_2$ -adrenergic agonists, sympathomimetic amines, lactose or any other excipients of the trial medication
- 9. Patients with narrow-angle glaucoma, urinary retention or severe renal impairment (history of an estimated glomerular filtration rate [eGFR]  $< 30$  mL/min/1.73 m<sup>2</sup> within 12 months before Visit 1 [Day -30]), including those with end-stage renal disease who require dialysis
- 10. Patients with an active/clinical history of asthma
- 11. A history of malignancy of any organ system (other than localised basal cell carcinoma of the skin), treated or untreated, within the past 5 years, regardless of an evidence of local recurrence or metastases
- 12. A documented history of  $> 1$  COPD exacerbations requiring treatment with systemic corticosteroids or antibiotics and/or hospitalisation in the past 12 months  
Patients who have not had a COPD exacerbation in the past 12 months or have developed a COPD exacerbation between screening (Visit 1 [Day -30]) and baseline

(Visit 2 [Day -7]) will not be eligible but will be permitted to be re-screened after a minimum of 6 weeks after resolution of the COPD exacerbation

13. Patients who, in the judgment of the investigator, have a clinically relevant laboratory abnormality or a clinically significant condition such as (but not limited to) unstable ischaemic heart disease, left ventricular failure (New York Heart Association [NYHA] class III and IV), history of myocardial infarction, arrhythmia (excluding chronic stable atrial fibrillation), uncontrolled hypo- or hyperthyroidism, hypokalaemia or hyperadrenergic state or any condition that might compromise patient safety or compliance, interfere with evaluation or preclude study completion
14. A history of resting QTc (Fridericia preferred, but Bazett acceptable) >450 ms (men) or >460 ms (women) within 5 years before Visit 1 (Day -30)
15. Patients who are treated with glycopyrronium bromide at Visit 1 (Day -30)  
Patients on non-selective  $\beta$ -blockers; such patients may enter the study after withdrawal of the non-selective  $\beta$ -blocker during a 7-day washout period
16. Patients receiving any other prohibited COPD-related medications; prohibited COPD-related medications must undergo the required washout period before Visit 2 (Day -7)
17. Patients who are, in the opinion of the investigator, known to be unreliable or non-compliant
18. Patients with a body mass index (BMI) of >40 kg/m<sup>2</sup>
19. Use of other investigational drugs within 5 half-lives of enrolment or within 30 days, whichever is longer



20. Pregnant or nursing (lactating) women, where pregnancy is defined as the state of a woman after conception and until the termination of gestation, confirmed by a positive human chorionic gonadotropin (hCG) laboratory test
21. Women of childbearing potential, defined as all women who are physiologically capable of becoming pregnant, unless they are using effective contraception methods while being on the study treatment

Subgroup analyses

Figure S1. Odds ratio of proportion of patients with CID in different subgroups based demographics and baseline characteristics in patients who switched to IND/GLY from LABA or LAMA in (A) D1, (B) D2 and (C) D3

**S1A.** Analysis of CID in patients who switched to IND/GLY from LABA or LAMA in D1

D1:  $\geq 100$  mL decrease in trough FEV<sub>1</sub>,  $\geq 1$  point decrease in TDI total score and AECOPD

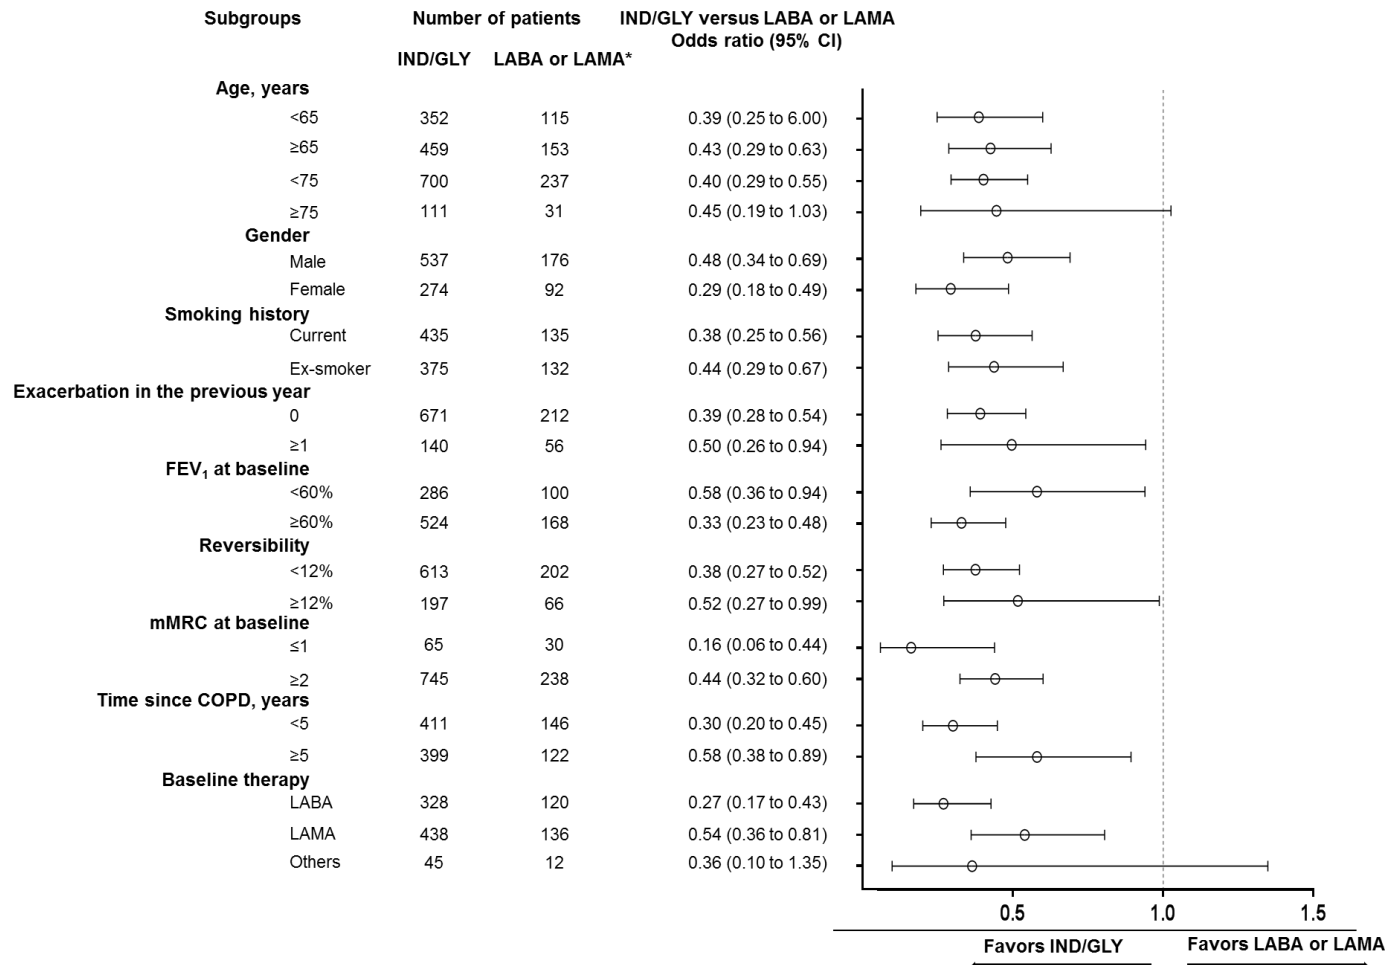

**S1B.** Analysis of CID in patients who switched to IND/GLY from LABA or LAMA in D2

D2:  $\geq 100$  mL decrease in trough FEV<sub>1</sub>,  $\geq 0.4$  point increase in CCQ total score and AECOPD

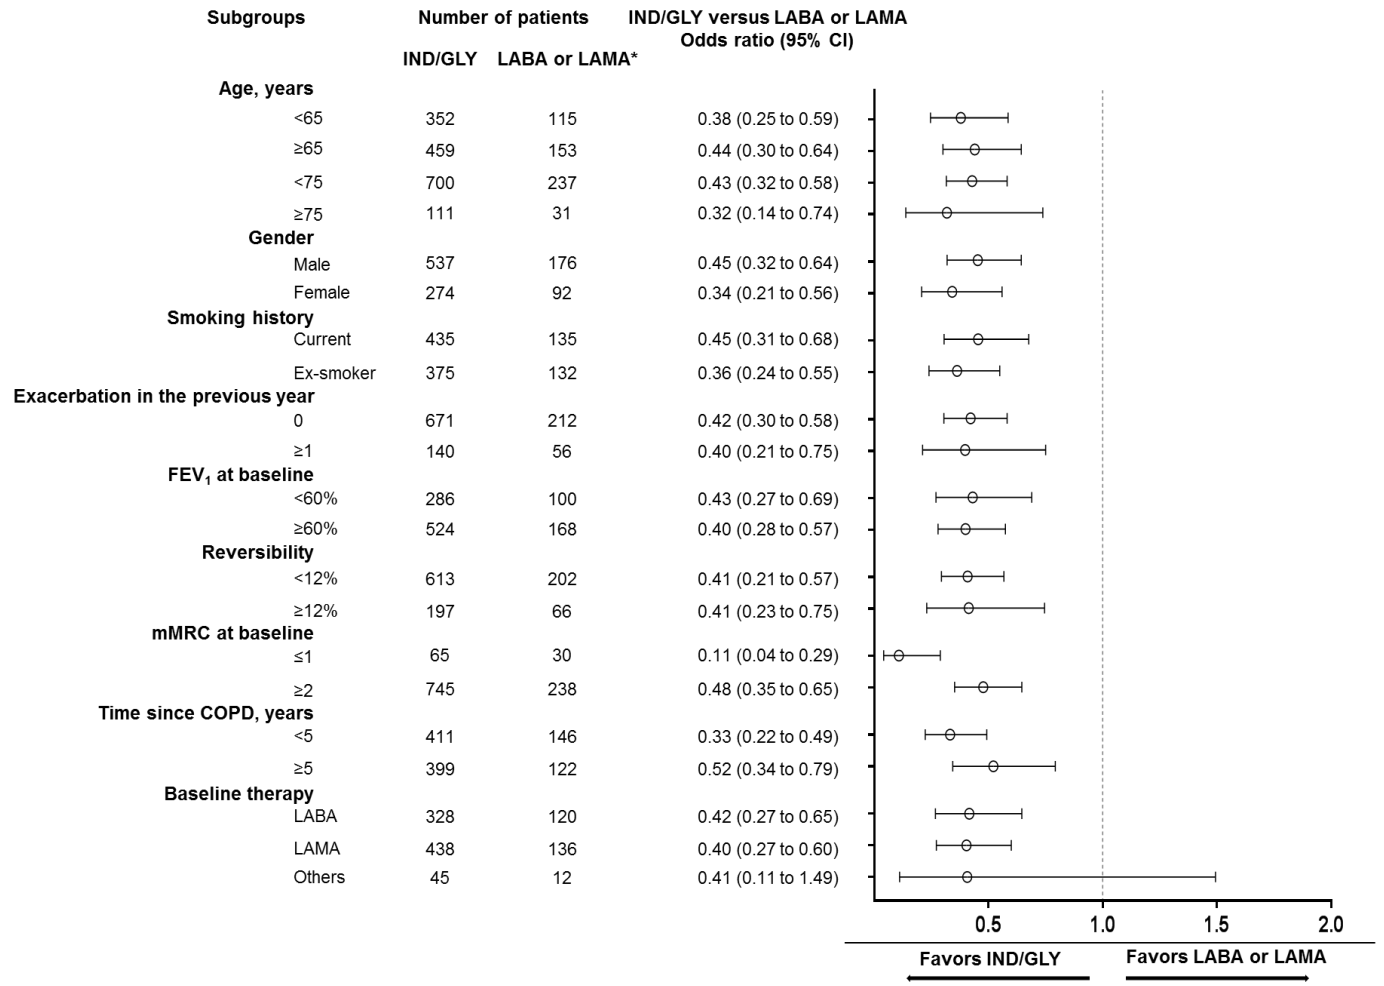

**S1C. Analysis of CID in patients who switched to IND/GLY from LABA or LAMA in D3**

D3:  $\geq 100$  mL decrease in trough FEV<sub>1</sub>,  $\geq 1$  point decrease in TDI total score,  $\geq 0.4$  point increase in CCQ total score and AECOPD

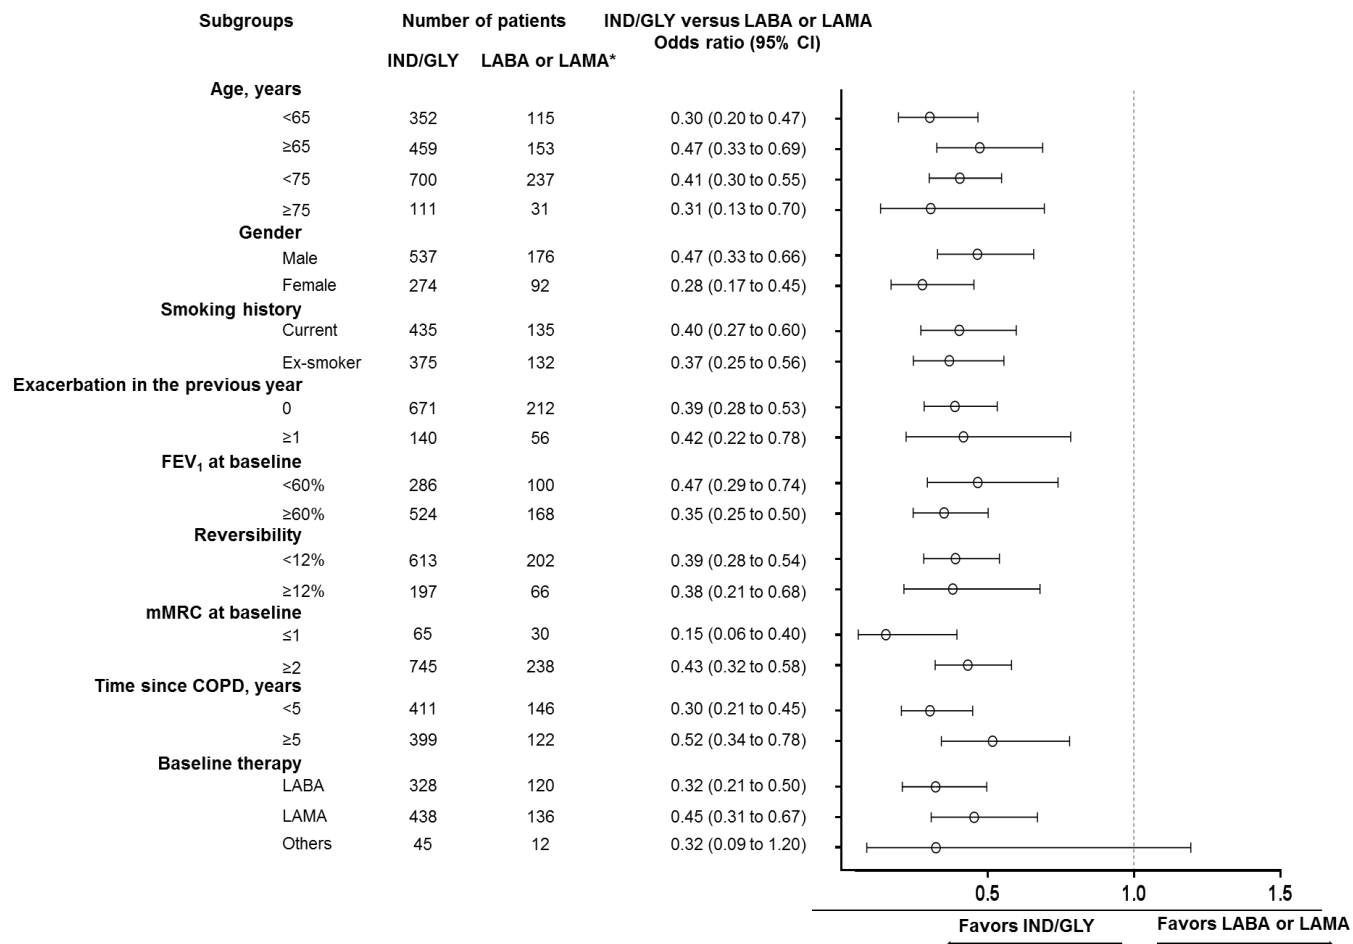

\*Patients had mMRC  $\geq 2$

AECOPD, acute exacerbation of moderate/severe COPD; COPD, chronic obstructive pulmonary disease; CI, confidence interval; CID, clinically important deterioration; CCQ, clinical COPD questionnaire; D1, D2 and D3, definitions of CID; FEV<sub>1</sub>, forced expiratory volume in 1 second; IND/GLY, indacaterol/glycopyrronium; LABA, long-acting  $\beta_2$ -agonist; LAMA, long-acting muscarinic antagonist; mMRC, modified Medical Research Council; TDI, transition dyspnea index

**Figure S2. Odds ratio of proportion of patients with CID in different subgroups based on demographics and baseline characteristics in patients who switched to IND/GLY from LABA + ICS in (A) D1, (B) D2 and (C) D3**

**S2A. Analysis of CID in patients who switched to IND/GLY from LABA + ICS in D1**

*D1:  $\geq 100$  mL decrease in trough FEV<sub>1</sub>,  $\geq 1$  point decrease in TDI total score and AECOPD*

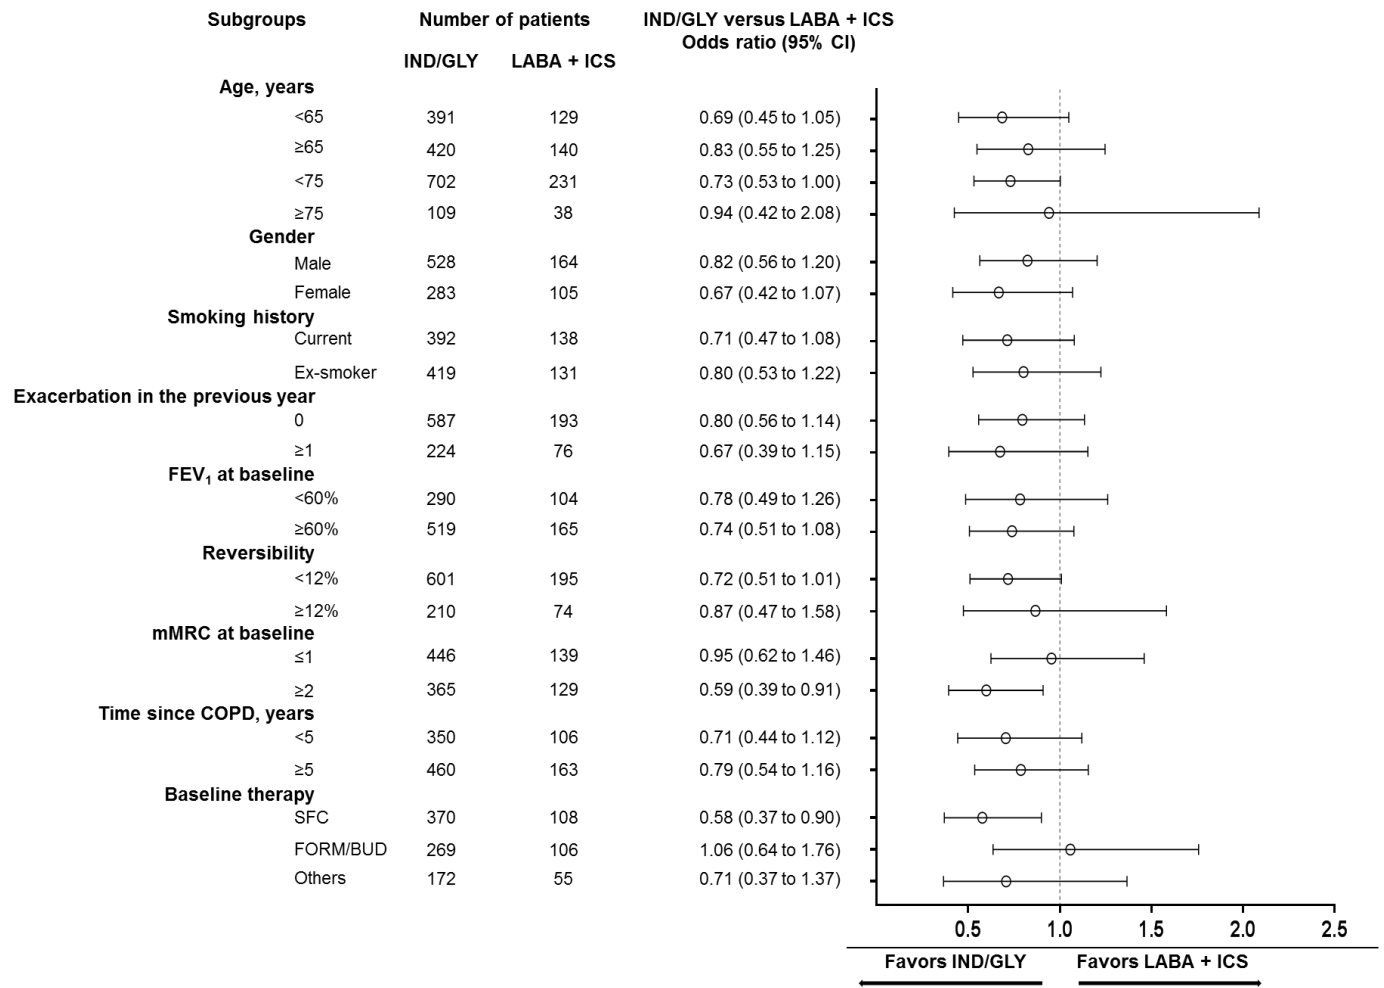

**S2B.** Analysis of CID in patients who switched to IND/GLY from LABA + ICS in D2

D2:  $\geq 100$  mL decrease in trough FEV<sub>1</sub>,  $\geq 0.4$  point increase in CCQ total score and AECOPD

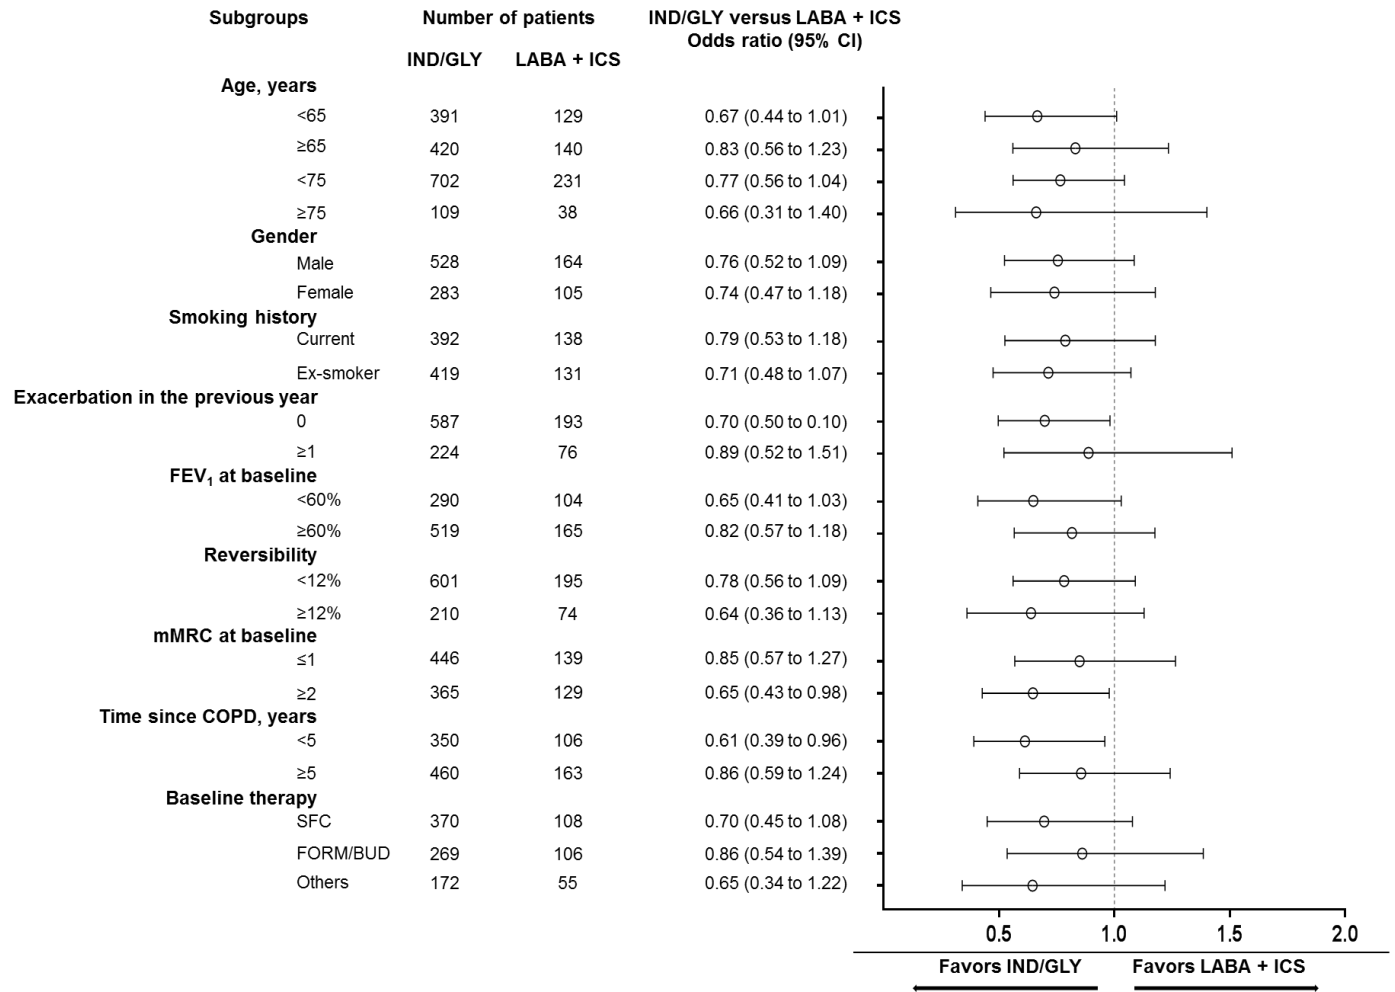

**S2C. Analysis of CID in patients who switched to IND/GLY from LABA + ICS in D3**

D3:  $\geq 100$  mL decrease in trough FEV<sub>1</sub>,  $\geq 1$  point decrease in TDI total score,  $\geq 0.4$  point increase in CCQ total score and AECOPD

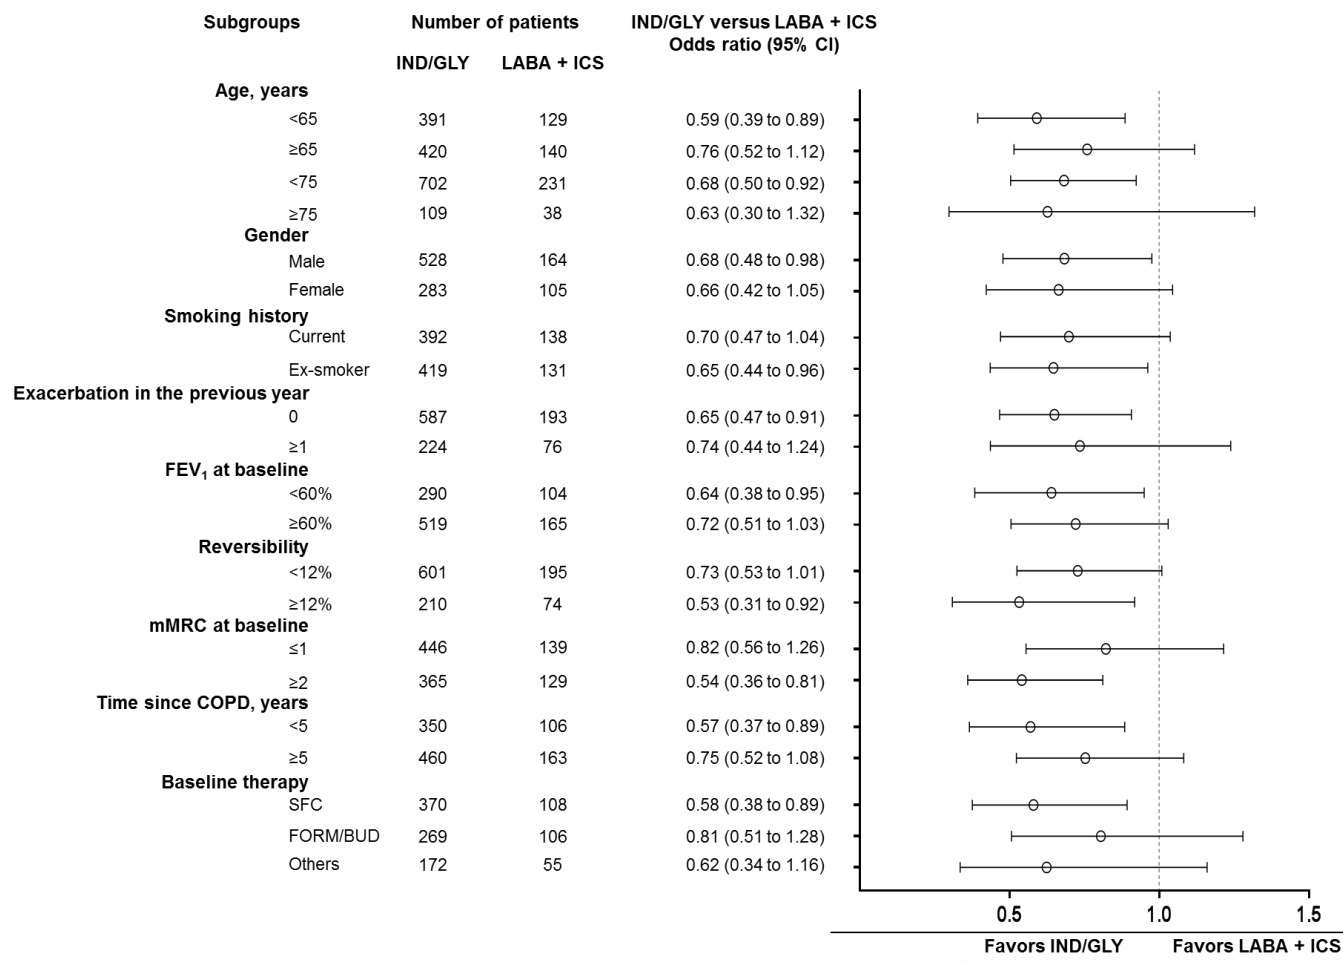

AECOPD, acute exacerbation of moderate/severe COPD; COPD, chronic obstructive pulmonary disease; CI, confidence interval; CID, clinically important deterioration; CCQ, clinical COPD questionnaire; D1, D2 and D3, definitions of CID; FEV<sub>1</sub>, forced expiratory volume in 1 second; ICS, inhaled corticosteroid; IND/GLY, indacaterol/glycopyrronium; LABA, long-acting  $\beta_2$ -agonist; mMRC, modified medical research council; SFC, salmeterol/fluticasone; FORM/BUD, formoterol/budesonide; TDI, transition dyspnea index

## S2. List of Independent Ethics Committees (IEC) or Institutional Review Boards (IRB) by study center

| <b>Ethics Committee or Institutional Review Board</b>             | <b>Department / Organization</b> | <b>City, State/Province, Postal Code<br/>Country</b> |
|-------------------------------------------------------------------|----------------------------------|------------------------------------------------------|
| Ethikkommission des Landes Oberösterreich                         |                                  | Linz 4020<br>Austria                                 |
| Ethikkommission des Landes Oberösterreich                         |                                  | Linz 4020<br>Austria                                 |
| Ethikkommission des Landes Oberösterreich                         |                                  | Linz 4020<br>Austria                                 |
| Ethikkommission des Landes Oberösterreich                         |                                  | Linz 4020<br>Austria                                 |
| Ethikkommission des Landes Oberösterreich                         |                                  | Linz 4020<br>Austria                                 |
| Ethikkommission des Landes Oberösterreich                         |                                  | Linz 4020<br>Austria                                 |
| Ethikkommission des Landes Oberösterreich                         |                                  | Linz 4020<br>Austria                                 |
| Ethikkommission des Landes Oberösterreich                         |                                  | Linz 4020<br>Austria                                 |
| Ethikkommission des Landes Oberösterreich                         |                                  | Linz 4020<br>Austria                                 |
| Comité d'Ethique Hospitalo-Facultaire Universitaire de Liège      |                                  | Liège NA<br>Belgium                                  |
| Comité d'Ethique Hospitalo-Facultaire Universitaire de Liège      |                                  | Liège NA<br>Belgium                                  |
| Comité d'Ethique des Hôpitaux IRIS Sud - Campus Molière Longchamp |                                  | Bruxelles NA<br>Belgium                              |
| Comité d'Ethique UCL - St.-Luc                                    |                                  | Bruxelles NA<br>Belgium                              |
| Comité d'Ethique Clinique Nôtre-Dame de Grace (Gosselies)         |                                  | Gosselies NA<br>Belgium                              |
| CHU Saint-Pierre - Comité local d'ethique hospitalier             |                                  | Bruxelles NA<br>Belgium                              |
| Centre Hospitalier Peltzer - La Tourelle - CE 133                 |                                  | Verviers NA<br>Belgium                               |
| Ethische Commissie AZ St.-Elisabeth                               |                                  | Zottegem NA<br>Belgium                               |









CRYSTAL CID manuscript supplementary

|                                                          |                          |                                                    |
|----------------------------------------------------------|--------------------------|----------------------------------------------------|
| CPP – Ile-de-France VI                                   | Groupe Pitié-Salpêtrière | Paris 75013<br>France                              |
| Ethik-Kommission der<br>Landesärztekammer Hessen         |                          | Frankfurt am Main Hessen<br>60488<br>Germany       |
| Ethikkommission der<br>Ärztekammer Nordrhein             |                          | Düsseldorf Nordrhein-Westfalen<br>40474<br>Germany |
| Landesamt für Gesundheit und<br>Soziales Berlin          |                          | Berlin Berlin 10639<br>Germany                     |
| Ethik-Kommission der<br>Bayerischen<br>Landesärztekammer |                          | München Bayern 81677<br>Germany                    |
| Ethik-Kommission der<br>Bayerischen<br>Landesärztekammer |                          | München Bayern 81677<br>Germany                    |
| Ethik-Kommission der<br>Bayerischen<br>Landesärztekammer |                          | München Bayern 81677<br>Germany                    |
| Ethik-Kommission der<br>Landesärztekammer Hessen         |                          | Frankfurt am Main Hessen<br>60488<br>Germany       |
| Landesamt für Gesundheit und<br>Soziales Berlin          |                          | Berlin Berlin 10639<br>Germany                     |
| Ethikkommission der<br>Ärztekammer des Landes<br>Sachsen |                          | Dresden Sachsen 01099<br>Germany                   |
| Ethikkommission der<br>Ärztekammer des Landes<br>Sachsen |                          | Dresden Sachsen 01099<br>Germany                   |
| Landesamt für Gesundheit und<br>Soziales Berlin          |                          | Berlin Berlin 10639<br>Germany                     |
| Ethik-Kommission der<br>Landesärztekammer Thüringen      |                          | Jena Thüringen 07751<br>Germany                    |
| Ethikkommission der<br>Ärztekammer des Landes<br>Sachsen |                          | Dresden Sachsen 01099<br>Germany                   |
| Ethikkommission der<br>Ärztekammer Nordrhein             |                          | Düsseldorf Nordrhein-Westfalen<br>40474<br>Germany |
| Ethikkommission der<br>Landesärztekammer<br>Brandenburg  |                          | Cottbus Brandenburg 03044<br>Germany               |
| Ethikkommission der<br>Ärztekammer des Landes<br>Sachsen |                          | Dresden Sachsen 01099<br>Germany                   |
| Ethik-Kommission der<br>Bayerischen<br>Landesärztekammer |                          | München Bayern 81677<br>Germany                    |
| Ethikkommission der<br>Ärztekammer des Landes<br>Sachsen |                          | Dresden Sachsen 01099<br>Germany                   |
| Ethik-Kommission der<br>Ärztekammer Sachsen-Anhalt       |                          | Halle Sachsen-Anhalt 06108<br>Germany              |



## CRYSTAL CID manuscript supplementary

|                                                                                                    |                                                                     |                                                    |
|----------------------------------------------------------------------------------------------------|---------------------------------------------------------------------|----------------------------------------------------|
| Ethikkommission der Ärztekammer Westfalen-Lippe und der Westfälischen Wilhelms-Universität Münster |                                                                     | Münster Nordrhein-Westfalen<br>48147<br>Germany    |
| Ethik-Kommission der Ärztekammer Sachsen-Anhalt                                                    |                                                                     | Halle Sachsen-Anhalt 06108<br>Germany              |
| Ethik-Kommission der Bayerischen Landesärztekammer                                                 |                                                                     | München Bayern 81677<br>Germany                    |
| Ethik-Kommission der Bayerischen Landesärztekammer                                                 |                                                                     | München Bayern 81677<br>Germany                    |
| Ethik-Kommission der Bayerischen Landesärztekammer                                                 |                                                                     | München Bayern 81677<br>Germany                    |
| Ethik-Kommission bei der Landesärztekammer Rheinland-Pfalz                                         |                                                                     | Mainz Rheinland-Pfalz 55116<br>Germany             |
| Ethik-Kommission der Landesärztekammer Hessen                                                      |                                                                     | Frankfurt am Main Hessen<br>60488<br>Germany       |
| Ethikkommission der Ärztekammer Nordrhein                                                          |                                                                     | Düsseldorf Nordrhein-Westfalen<br>40474<br>Germany |
| Landesamt für Gesundheit und Soziales Berlin                                                       |                                                                     | Berlin Berlin 10639<br>Germany                     |
| Ethik-Kommission der Landesärztekammer Hessen                                                      |                                                                     | Frankfurt am Main Hessen<br>60488<br>Germany       |
| Ethikkommission der Ärztekammer Westfalen-Lippe und der Westfälischen Wilhelms-Universität Münster |                                                                     | Münster Nordrhein-Westfalen<br>48147<br>Germany    |
| Ethikkommission bei der Ärztekammer Niedersachsen                                                  | Unterkommission zur Beurteilung medizinischer Forschung am Menschen | Hannover Niedersachsen<br>30175<br>Germany         |
| Ethik-Kommission der Ärztekammer Sachsen-Anhalt                                                    |                                                                     | Halle Sachsen-Anhalt 06108<br>Germany              |
| Landesamt für Gesundheit und Soziales Berlin                                                       |                                                                     | Berlin Berlin 10639<br>Germany                     |
| Ethikkommission bei der Ärztekammer Niedersachsen                                                  | Unterkommission zur Beurteilung medizinischer Forschung am Menschen | Hannover Niedersachsen<br>30175<br>Germany         |
| Ethikkommission der Ärztekammer des Landes Sachsen                                                 |                                                                     | Dresden Sachsen 01099<br>Germany                   |
| Ethik-Kommission der Bayerischen Landesärztekammer                                                 |                                                                     | München Bayern 81677<br>Germany                    |
| Landesamt für Gesundheit und Soziales Berlin                                                       |                                                                     | Berlin Berlin 10639<br>Germany                     |
| Ethikkommission der Landesärztekammer Baden-Württemberg                                            |                                                                     | Stuttgart Baden-Württemberg<br>70597<br>Germany    |

## CRYSTAL CID manuscript supplementary

|                                                                                                    |                                                                     |                                                  |
|----------------------------------------------------------------------------------------------------|---------------------------------------------------------------------|--------------------------------------------------|
| Ethik-Kommission der Ärztekammer Sachsen-Anhalt                                                    |                                                                     | Halle Sachsen-Anhalt 06108<br>Germany            |
| Ethikkommission bei der Ärztekammer Niedersachsen                                                  | Unterkommission zur Beurteilung medizinischer Forschung am Menschen | Hannover Niedersachsen 30175<br>Germany          |
| Ethikkommission der Ärztekammer des Landes Sachsen                                                 |                                                                     | Dresden Sachsen 01099<br>Germany                 |
| Landesamt für Gesundheit und Soziales Berlin                                                       |                                                                     | Berlin Berlin 10639<br>Germany                   |
| Ethik-Kommission der Landesärztekammer Hessen                                                      |                                                                     | Frankfurt am Main Hessen 60488<br>Germany        |
| Ethik-Kommission der Bayerischen Landesärztekammer                                                 |                                                                     | München Bayern 81677<br>Germany                  |
| Landesamt für Gesundheit und Soziales Berlin                                                       |                                                                     | Berlin Berlin 10639<br>Germany                   |
| Ethikkommission der Ärztekammer des Landes Sachsen                                                 |                                                                     | Dresden Sachsen 01099<br>Germany                 |
| Landesamt für Gesundheit und Soziales Berlin                                                       |                                                                     | Berlin Berlin 10639<br>Germany                   |
| Ethikkommission der Ärztekammer Nordrhein                                                          |                                                                     | Düsseldorf Nordrhein-Westfalen 40474<br>Germany  |
| Ethikkommission Fachbereich Medizin der Philipps-Universität Marburg                               |                                                                     | Marburg Hessen 35032<br>Germany                  |
| Ethikkommission bei der Ärztekammer Niedersachsen                                                  | Unterkommission zur Beurteilung medizinischer Forschung am Menschen | Hannover Niedersachsen 30175<br>Germany          |
| Ethik-Kommission der Bayerischen Landesärztekammer                                                 |                                                                     | München Bayern 81677<br>Germany                  |
| Ethik-Kommission der Bayerischen Landesärztekammer                                                 |                                                                     | München Bayern 81677<br>Germany                  |
| Ethik-Kommission der Ärztekammer Schleswig-Holstein                                                |                                                                     | Bad Segeberg Schleswig-Holstein 23795<br>Germany |
| Ethikkommission der Ärztekammer Westfalen-Lippe und der Westfälischen Wilhelms-Universität Münster |                                                                     | Münster Nordrhein-Westfalen 48147<br>Germany     |
| Ethikkommission bei der Ärztekammer Niedersachsen                                                  | Unterkommission zur Beurteilung medizinischer Forschung am Menschen | Hannover Niedersachsen 30175<br>Germany          |
| Ethik-Kommission der Bayerischen Landesärztekammer                                                 |                                                                     | München Bayern 81677<br>Germany                  |
| Landesamt für Gesundheit und Soziales Berlin                                                       |                                                                     | Berlin Berlin 10639<br>Germany                   |

CRYSTAL CID manuscript supplementary

|                                                                                                            |                                                      |
|------------------------------------------------------------------------------------------------------------|------------------------------------------------------|
| Ethikkommission der<br>Ärztammer Nordrhein                                                                 | Düsseldorf Nordrhein-Westfalen<br>40474<br>Germany   |
| Ethikkommission der<br>Ärztammer Nordrhein                                                                 | Düsseldorf Nordrhein-Westfalen<br>40474<br>Germany   |
| Ethik-Kommission der<br>Medizinischen Fakultät der<br>Universität Duisburg-Essen                           | Essen Nordrhein-Westfalen<br>45147<br>Germany        |
| Ethikkommission der<br>Landesärztekammer Baden-<br>Württemberg                                             | Stuttgart Baden-Württemberg<br>70597<br>Germany      |
| Landesamt für Gesundheit und<br>Soziales Berlin                                                            | Berlin Berlin 10639<br>Germany                       |
| Ethik-Kommission der<br>Ärztammer Hamburg                                                                  | Hamburg Hamburg 22083<br>Germany                     |
| Landesamt für Gesundheit und<br>Soziales Berlin                                                            | Berlin Berlin 10639<br>Germany                       |
| Ethikkommission der<br>Landesärztekammer Baden-<br>Württemberg                                             | Stuttgart Baden-Württemberg<br>70597<br>Germany      |
| Ethik-Kommission der<br>Ärztammer Schleswig-Holstein                                                       | Bad Segeberg Schleswig-<br>Holstein 23795<br>Germany |
| Ethik-Kommission der<br>Ärztammer Schleswig-Holstein                                                       | Bad Segeberg Schleswig-<br>Holstein 23795<br>Germany |
| Ethikkommission der<br>Ärztammer Westfalen-Lippe<br>und der Westfälischen Wilhelms-<br>Universität Münster | Münster Nordrhein-Westfalen<br>48147<br>Germany      |
| Ethikkommission der<br>Ärztammer Westfalen-Lippe<br>und der Westfälischen Wilhelms-<br>Universität Münster | Münster Nordrhein-Westfalen<br>48147<br>Germany      |
| Ethik-Kommission der<br>Ärztammer Sachsen-Anhalt                                                           | Halle Sachsen-Anhalt 06108<br>Germany                |
| Ethik-Kommission der<br>Ärztammer Sachsen-Anhalt                                                           | Halle Sachsen-Anhalt 06108<br>Germany                |
| Ethikkommission der<br>Ärztammer Westfalen-Lippe<br>und der Westfälischen Wilhelms-<br>Universität Münster | Münster Nordrhein-Westfalen<br>48147<br>Germany      |
| Ethikkommission der<br>Landesärztekammer Baden-<br>Württemberg                                             | Stuttgart Baden-Württemberg<br>70597<br>Germany      |
| Ethik-Kommission der<br>Ärztammer Schleswig-Holstein                                                       | Bad Segeberg Schleswig-<br>Holstein 23795<br>Germany |
| Ethikkommission der<br>Landesärztekammer Baden-<br>Württemberg                                             | Stuttgart Baden-Württemberg<br>70597<br>Germany      |



## CRYSTAL CID manuscript supplementary

|                                                                                                    |                                                                     |                                                    |
|----------------------------------------------------------------------------------------------------|---------------------------------------------------------------------|----------------------------------------------------|
| Ethikkommission der Landesärztekammer Baden-Württemberg                                            |                                                                     | Stuttgart Baden-Württemberg<br>70597<br>Germany    |
| Ethik-Kommission der Landesärztekammer Hessen                                                      |                                                                     | Frankfurt am Main Hessen<br>60488<br>Germany       |
| Ethik-Kommission der Ärztekammer Hamburg                                                           |                                                                     | Hamburg Hamburg 22083<br>Germany                   |
| Ethikkommission der Ärztekammer Nordrhein                                                          |                                                                     | Düsseldorf Nordrhein-Westfalen<br>40474<br>Germany |
| Ethik-Kommission bei der Landesärztekammer Rheinland-Pfalz                                         |                                                                     | Mainz Rheinland Pfalz 55116<br>Germany             |
| Ethikkommission der Ärztekammer Nordrhein                                                          |                                                                     | Düsseldorf Nordrhein-Westfalen<br>40474<br>Germany |
| Ethik-Kommission bei der Landesärztekammer Rheinland-Pfalz                                         |                                                                     | Mainz Rheinland Pfalz 55116<br>Germany             |
| Ethikkommission bei der Ärztekammer Niedersachsen                                                  | Unterkommission zur Beurteilung medizinischer Forschung am Menschen | Hannover Niedersachsen<br>30175<br>Germany         |
| Ethik-Kommission der Ärztekammer Hamburg                                                           |                                                                     | Hamburg Hamburg 22083<br>Germany                   |
| Ärztekammer des Saarlandes Ethik-Kommission                                                        |                                                                     | Saarbrücken Saarland 66111<br>Germany              |
| Ethikkommission bei der Ärztekammer Niedersachsen                                                  | Unterkommission zur Beurteilung medizinischer Forschung am Menschen | Hannover Niedersachsen<br>30175<br>Germany         |
| Ethik-Kommission der Ärztekammer Hamburg                                                           |                                                                     | Hamburg Hamburg 22083<br>Germany                   |
| Ethik-Kommission bei der Landesärztekammer Rheinland-Pfalz                                         |                                                                     | Mainz Rheinland Pfalz 55116<br>Germany             |
| Ethik-Kommission der Landesärztekammer Thüringen                                                   |                                                                     | Jena Thüringen 07751<br>Germany                    |
| Ethik-Kommission bei der Landesärztekammer Rheinland-Pfalz                                         |                                                                     | Mainz Rheinland Pfalz 55116<br>Germany             |
| Ethikkommission der Ärztekammer Nordrhein                                                          |                                                                     | Düsseldorf Nordrhein-Westfalen<br>40474<br>Germany |
| Ethikkommission der Ärztekammer Westfalen-Lippe und der Westfälischen Wilhelms-Universität Münster |                                                                     | Münster Nordrhein-Westfalen<br>48147<br>Germany    |
| Ethikkommission der Ärztekammer Nordrhein                                                          |                                                                     | Düsseldorf Nordrhein-Westfalen<br>40474<br>Germany |



## CRYSTAL CID manuscript supplementary

|                                                                                                            |                                                    |
|------------------------------------------------------------------------------------------------------------|----------------------------------------------------|
| Ethikkommission der<br>Ärztammer Nordrhein                                                                 | Düsseldorf Nordrhein-Westfalen<br>40474<br>Germany |
| Ethikkommission der<br>Ärztammer Westfalen-Lippe<br>und der Westfälischen Wilhelms-<br>Universität Münster | Münster Nordrhein-Westfalen<br>48147<br>Germany    |
| Ethikkommission der<br>Ärztammer des Landes<br>Sachsen                                                     | Dresden Sachsen 01099<br>Germany                   |
| Ethikkommission der<br>Ärztammer des Landes<br>Sachsen                                                     | Dresden Sachsen 01099<br>Germany                   |
| Ethikkommission der<br>Ärztammer des Landes<br>Sachsen                                                     | Dresden Sachsen 01099<br>Germany                   |
| Landesamt für Gesundheit und<br>Soziales Berlin                                                            | Berlin Berlin 10639<br>Germany                     |
| Ethikkommission der<br>Ärztammer Westfalen-Lippe<br>und der Westfälischen Wilhelms-<br>Universität Münster | Münster Nordrhein-Westfalen<br>48147<br>Germany    |
| Ethik-Kommission der<br>Landesärztekammer Hessen                                                           | Frankfurt am Main Hessen<br>60488<br>Germany       |
| Ethikkommission der<br>Ärztammer Nordrhein                                                                 | Düsseldorf Nordrhein-Westfalen<br>40474<br>Germany |
| Ethikkommission der<br>Ärztammer Westfalen-Lippe<br>und der Westfälischen Wilhelms-<br>Universität Münster | Münster Nordrhein-Westfalen<br>48147<br>Germany    |
| Ethikkommission der<br>Ärztammer des Landes<br>Sachsen                                                     | Dresden Sachsen 01099<br>Germany                   |
| Ärztammer des Saarlandes<br>Ethik-Kommission                                                               | Saarbrücken Saarland 66111<br>Germany              |
| Ethik-Kommission der<br>Bayerischen<br>Landesärztekammer                                                   | München Bayern 81677<br>Germany                    |
| Ethik-Kommission der<br>Bayerischen<br>Landesärztekammer                                                   | München Bayern 81677<br>Germany                    |
| Ethik-Kommission der<br>Bayerischen<br>Landesärztekammer                                                   | München Bayern 81677<br>Germany                    |
| Ethikkommission der<br>Ärztammer Westfalen-Lippe<br>und der Westfälischen Wilhelms-<br>Universität Münster | Münster Nordrhein-Westfalen<br>48147<br>Germany    |

## CRYSTAL CID manuscript supplementary

|                                                                                                    |                                                                     |                                                 |
|----------------------------------------------------------------------------------------------------|---------------------------------------------------------------------|-------------------------------------------------|
| Ethikkommission der Ärztekammer des Landes Sachsen                                                 |                                                                     | Dresden Sachsen 01099<br>Germany                |
| Ethikkommission an der Medizinischen Fakultät der Universität Rostock                              | Institut für Rechtsmedizin                                          | Rostock Mecklenburg-Vorpommern 18055<br>Germany |
| Ethik-Kommission bei der Landesärztekammer Rheinland-Pfalz                                         |                                                                     | Mainz Rheinland Pfalz 55116<br>Germany          |
| Ethikkommission bei der Ärztekammer Niedersachsen                                                  | Unterkommission zur Beurteilung medizinischer Forschung am Menschen | Hannover Niedersachsen 30175<br>Germany         |
| Ethikkommission der Ärztekammer Westfalen-Lippe und der Westfälischen Wilhelms-Universität Münster |                                                                     | Münster Nordrhein-Westfalen 48147<br>Germany    |
| Ethik-Kommission der Ärztekammer Hamburg                                                           |                                                                     | Hamburg Hamburg 22083<br>Germany                |
| Ethik-Kommission der Landesärztekammer Hessen                                                      |                                                                     | Frankfurt am Main Hessen 60488<br>Germany       |
| Ethik-Kommission der Bayerischen Landesärztekammer                                                 |                                                                     | München Bayern 81677<br>Germany                 |
| Ethikkommission der Ärztekammer Nordrhein                                                          |                                                                     | Düsseldorf Nordrhein-Westfalen 40474<br>Germany |
| Ethik-Kommission bei der Landesärztekammer Rheinland-Pfalz                                         |                                                                     | Mainz Rheinland Pfalz 55116<br>Germany          |
| Ethikkommission der Landesärztekammer Baden-Württemberg                                            |                                                                     | Stuttgart Baden-Württemberg 70597<br>Germany    |
| Ethikkommission bei der Ärztekammer Niedersachsen                                                  | Unterkommission zur Beurteilung medizinischer Forschung am Menschen | Hannover Niedersachsen 30175<br>Germany         |
| Ethikkommission der Ärztekammer Westfalen-Lippe und der Westfälischen Wilhelms-Universität Münster |                                                                     | Münster Nordrhein-Westfalen 48147<br>Germany    |
| Ethikkommission der Landesärztekammer Baden-Württemberg                                            |                                                                     | Stuttgart Baden-Württemberg 70597<br>Germany    |
| Ethik-Kommission der Bayerischen Landesärztekammer                                                 |                                                                     | München Bayern 81677<br>Germany                 |
| Ethikkommission bei der Ärztekammer Niedersachsen                                                  | Unterkommission zur Beurteilung medizinischer Forschung am Menschen | Hannover Niedersachsen 30175<br>Germany         |
| Landesamt für Gesundheit und Soziales Berlin                                                       |                                                                     | Berlin Berlin 10639<br>Germany                  |

## CRYSTAL CID manuscript supplementary

|                                                                                                            |                                                    |
|------------------------------------------------------------------------------------------------------------|----------------------------------------------------|
| Ethikkommission der<br>Ärztammer Westfalen-Lippe<br>und der Westfälischen Wilhelms-<br>Universität Münster | Münster Nordrhein-Westfalen<br>48147<br>Germany    |
| Landesamt für Gesundheit und<br>Soziales Berlin                                                            | Berlin Berlin 10639<br>Germany                     |
| Ethik-Kommission der<br>Landesärztekammer Thüringen                                                        | Jena Thüringen 07751<br>Germany                    |
| Ethik-Kommission der<br>Bayerischen<br>Landesärztekammer                                                   | München Bayern 81677<br>Germany                    |
| Ethikkommission der<br>Landesärztekammer<br>Brandenburg                                                    | Cottbus Brandenburg 03044<br>Germany               |
| Ethikkommission der<br>Ärztammer Nordrhein                                                                 | Düsseldorf Nordrhein-Westfalen<br>40474<br>Germany |
| Ethik-Kommission bei der<br>Landesärztekammer Rheinland-<br>Pfalz                                          | Mainz Rheinland Pfalz 55116<br>Germany             |
| Ethik-Kommission bei der<br>Landesärztekammer Rheinland-<br>Pfalz                                          | Mainz Rheinland Pfalz 55116<br>Germany             |
| Ethikkommission der<br>Ärztammer Nordrhein                                                                 | Düsseldorf Nordrhein-Westfalen<br>40474<br>Germany |
| Ethik-Kommission der<br>Landesärztekammer Thüringen                                                        | Jena Thüringen 07751<br>Germany                    |
| Ethikkommission der<br>Landesärztekammer<br>Brandenburg                                                    | Cottbus Brandenburg 03044<br>Germany               |
| Ethikkommission der<br>Landesärztekammer<br>Brandenburg                                                    | Cottbus Brandenburg 03044<br>Germany               |
| Ethikkommission der<br>Ärztammer Nordrhein                                                                 | Düsseldorf Nordrhein-Westfalen<br>40474<br>Germany |
| Ethikkommission der<br>Ärztammer Nordrhein                                                                 | Düsseldorf Nordrhein-Westfalen<br>40474<br>Germany |
| Landesamt für Gesundheit und<br>Soziales Berlin                                                            | Berlin Berlin 10639<br>Germany                     |
| Landesamt für Gesundheit und<br>Soziales Berlin                                                            | Berlin Berlin 10639<br>Germany                     |
| Ethikkommission der<br>Landesärztekammer Baden-<br>Württemberg                                             | Stuttgart Baden-Württemberg<br>70597<br>Germany    |
| Ethik-Kommission der<br>Ärztammer Sachsen-Anhalt                                                           | Halle Sachsen-Anhalt 06108<br>Germany              |
| Ethikkommission der<br>Ärztammer Nordrhein                                                                 | Düsseldorf Nordrhein-Westfalen<br>40474<br>Germany |

## CRYSTAL CID manuscript supplementary

|                                                                                                    |                                                                     |                                                    |
|----------------------------------------------------------------------------------------------------|---------------------------------------------------------------------|----------------------------------------------------|
| Ethikkommission der Ärztekammer Nordrhein                                                          |                                                                     | Düsseldorf Nordrhein-Westfalen<br>40474<br>Germany |
| Ethik-Kommission bei der Landesärztekammer Rheinland-Pfalz                                         |                                                                     | Mainz Rheinland Pfalz 55116<br>Germany             |
| Ethik-Kommission der Medizinischen Fakultät der Christian-Albrechts-Universität zu Kiel            |                                                                     | Kiel Schleswig-Holstein 24105<br>Germany           |
| Ethikkommission der Ärztekammer Nordrhein                                                          |                                                                     | Düsseldorf Nordrhein-Westfalen<br>40474<br>Germany |
| Ethik-Kommission der Landesärztekammer Hessen                                                      |                                                                     | Frankfurt am Main Hessen<br>60488<br>Germany       |
| Ethik-Kommission der Ärztekammer Hamburg                                                           |                                                                     | Hamburg Hamburg 22083<br>Germany                   |
| Ethik-Kommission bei der Landesärztekammer Rheinland-Pfalz                                         |                                                                     | Mainz Rheinland Pfalz 55116<br>Germany             |
| Ethikkommission der Ärztekammer Westfalen-Lippe und der Westfälischen Wilhelms-Universität Münster |                                                                     | Münster Nordrhein-Westfalen<br>48147<br>Germany    |
| Ethikkommission der Ärztekammer Westfalen-Lippe und der Westfälischen Wilhelms-Universität Münster |                                                                     | Münster Nordrhein-Westfalen<br>48147<br>Germany    |
| Ethikkommission bei der Ärztekammer Niedersachsen                                                  | Unterkommission zur Beurteilung medizinischer Forschung am Menschen | Hannover Niedersachsen<br>30175<br>Germany         |
| Ethikkommission der Ärztekammer Westfalen-Lippe und der Westfälischen Wilhelms-Universität Münster |                                                                     | Münster Nordrhein-Westfalen<br>48147<br>Germany    |
| Ethik-Kommission der Bayerischen Landesärztekammer                                                 |                                                                     | München Bayern 81677<br>Germany                    |
| Ethikkommission der Ärztekammer Nordrhein                                                          |                                                                     | Düsseldorf Nordrhein-Westfalen<br>40474<br>Germany |
| Ethikkommission der Ärztekammer Nordrhein                                                          |                                                                     | Düsseldorf Nordrhein-Westfalen<br>40474<br>Germany |
| Ethik-Kommission der Medizinischen Fakultät der Universität Erlangen-Nürnberg                      |                                                                     | Erlangen Bayern 91054<br>Germany                   |
| Ethik-Kommission der Bayerischen Landesärztekammer                                                 |                                                                     | München Bayern 81677<br>Germany                    |
| Ethik-Kommission der Ärztekammer Sachsen-Anhalt                                                    |                                                                     | Halle Sachsen-Anhalt 06108<br>Germany              |



## CRYSTAL CID manuscript supplementary

|                                                                                                    |                                                                     |                                                    |
|----------------------------------------------------------------------------------------------------|---------------------------------------------------------------------|----------------------------------------------------|
| Ethik-Kommission der Landesärztekammer Hessen                                                      |                                                                     | Frankfurt am Main Hessen<br>60488<br>Germany       |
| Ethikkommission der Ärztekammer des Landes Sachsen                                                 |                                                                     | Dresden Sachsen 01099<br>Germany                   |
| Landesamt für Gesundheit und Soziales Berlin                                                       |                                                                     | Berlin Berlin 10639<br>Germany                     |
| Ethikkommission der Ärztekammer Westfalen-Lippe und der Westfälischen Wilhelms-Universität Münster |                                                                     | Münster Nordrhein-Westfalen<br>48147<br>Germany    |
| Ethikkommission der Ärztekammer Nordrhein                                                          |                                                                     | Düsseldorf Nordrhein-Westfalen<br>40474<br>Germany |
| Ethikkommission der Ärztekammer Nordrhein                                                          |                                                                     | Düsseldorf Nordrhein-Westfalen<br>40474<br>Germany |
| Ethik-Kommission der Landesärztekammer Hessen                                                      |                                                                     | Frankfurt am Main Hessen<br>60488<br>Germany       |
| Ethikkommission der Landesärztekammer Baden-Württemberg                                            |                                                                     | Stuttgart Baden-Württemberg<br>70597<br>Germany    |
| Ethik-Kommission der Bayerischen Landesärztekammer                                                 |                                                                     | München Bayern 81677<br>Germany                    |
| Landesamt für Gesundheit und Soziales Berlin                                                       |                                                                     | Berlin Berlin 10639<br>Germany                     |
| Ethikkommission der Landesärztekammer Baden-Württemberg                                            |                                                                     | Stuttgart Baden-Württemberg<br>70597<br>Germany    |
| Ethikkommission der Landesärztekammer Brandenburg                                                  |                                                                     | Cottbus Brandenburg 03044<br>Germany               |
| Ethikkommission der Landesärztekammer Brandenburg                                                  |                                                                     | Cottbus Brandenburg 03044<br>Germany               |
| Landesamt für Gesundheit und Soziales Berlin                                                       |                                                                     | Berlin Berlin 10639<br>Germany                     |
| Ethikkommission bei der Ärztekammer Niedersachsen                                                  | Unterkommission zur Beurteilung medizinischer Forschung am Menschen | Hannover Niedersachsen<br>30175<br>Germany         |
| Ethikkommission bei der Ärztekammer Niedersachsen                                                  | Unterkommission zur Beurteilung medizinischer Forschung am Menschen | Hannover Niedersachsen<br>30175<br>Germany         |
| Ethik-Kommission der Friedrich Schiller Universität Jena an der Medizinischen Fakultät             |                                                                     | Jena Thüringen 07740<br>Germany                    |
| Ethik-Kommission der Bayerischen Landesärztekammer                                                 |                                                                     | München Bayern 81677<br>Germany                    |

CRYSTAL CID manuscript supplementary

|                                                                                                    |                                                                     |                                                  |
|----------------------------------------------------------------------------------------------------|---------------------------------------------------------------------|--------------------------------------------------|
| Ethikkommission der Ärztekammer des Landes Sachsen                                                 |                                                                     | Dresden Sachsen 01099<br>Germany                 |
| Ethikkommission der Ärztekammer des Landes Sachsen                                                 |                                                                     | Dresden Sachsen 01099<br>Germany                 |
| Ethik-Kommission der Ärztekammer Schleswig-Holstein                                                |                                                                     | Bad Segeberg Schleswig-Holstein 23795<br>Germany |
| Ethikkommission der Ärztekammer des Landes Sachsen                                                 |                                                                     | Dresden Sachsen 01099<br>Germany                 |
| Ethikkommission bei der Ärztekammer Niedersachsen                                                  | Unterkommission zur Beurteilung medizinischer Forschung am Menschen | Hannover Niedersachsen 30175<br>Germany          |
| Ethikkommission der Landesärztekammer Brandenburg                                                  |                                                                     | Cottbus Brandenburg 03044<br>Germany             |
| Ethikkommission der Ärztekammer Westfalen-Lippe und der Westfälischen Wilhelms-Universität Münster |                                                                     | Münster Nordrhein-Westfalen 48147<br>Germany     |
| Ethik-Kommission der Ärztekammer Sachsen-Anhalt                                                    |                                                                     | Halle Sachsen-Anhalt 06108<br>Germany            |
| Ethikkommission der Ärztekammer des Landes Sachsen                                                 |                                                                     | Dresden Sachsen 01099<br>Germany                 |
| Ethik-Kommission der Landesärztekammer Hessen                                                      |                                                                     | Frankfurt am Main Hessen 60488<br>Germany        |
| Ethikkommission der Ärztekammer Westfalen-Lippe und der Westfälischen Wilhelms-Universität Münster |                                                                     | Münster Nordrhein-Westfalen 48147<br>Germany     |
| Ethikkommission der Ärztekammer des Landes Sachsen                                                 |                                                                     | Dresden Sachsen 01099<br>Germany                 |
| Ethikkommission der Landesärztekammer Brandenburg                                                  |                                                                     | Cottbus Brandenburg 03044<br>Germany             |
| Landesamt für Gesundheit und Soziales Berlin                                                       |                                                                     | Berlin Berlin 10639<br>Germany                   |
| Ethikkommission der Landesärztekammer Baden-Württemberg                                            |                                                                     | Stuttgart Baden-Württemberg 70597<br>Germany     |
| National Ethics Committee (EED)                                                                    |                                                                     | Cholargos Athens 155 62<br>Greece                |
| National Ethics Committee (EED)                                                                    |                                                                     | Cholargos Athens 155 62<br>Greece                |
| National Ethics Committee (EED)                                                                    |                                                                     | Cholargos Athens 155 62<br>Greece                |
| National Ethics Committee (EED)                                                                    |                                                                     | Cholargos Athens 155 62<br>Greece                |

## CRYSTAL CID manuscript supplementary

|                                                                                                             |                                            |                          |           |
|-------------------------------------------------------------------------------------------------------------|--------------------------------------------|--------------------------|-----------|
| Medical Research Council                                                                                    | Ethics Committee for Clinical Pharmacology | Budapest Hungary         | 1051      |
| Medical Research Council                                                                                    | Ethics Committee for Clinical Pharmacology | Budapest Hungary         | 1051      |
| Medical Research Council                                                                                    | Ethics Committee for Clinical Pharmacology | Budapest Hungary         | 1051      |
| Medical Research Council                                                                                    | Ethics Committee for Clinical Pharmacology | Budapest Hungary         | 1051      |
| Medical Research Council                                                                                    | Ethics Committee for Clinical Pharmacology | Budapest Hungary         | 1051      |
| Medical Research Council                                                                                    | Ethics Committee for Clinical Pharmacology | Budapest Hungary         | 1051      |
| Medical Research Council                                                                                    | Ethics Committee for Clinical Pharmacology | Budapest Hungary         | 1051      |
| Medical Research Council                                                                                    | Ethics Committee for Clinical Pharmacology | Budapest Hungary         | 1051      |
| Medical Research Council                                                                                    | Ethics Committee for Clinical Pharmacology | Budapest Hungary         | 1051      |
| Medical Research Council                                                                                    | Ethics Committee for Clinical Pharmacology | Budapest Hungary         | 1051      |
| Medical Research Council                                                                                    | Ethics Committee for Clinical Pharmacology | Budapest Hungary         | 1051      |
| Medical Research Council                                                                                    | Ethics Committee for Clinical Pharmacology | Budapest Hungary         | 1051      |
| Medical Research Council                                                                                    | Ethics Committee for Clinical Pharmacology | Budapest Hungary         | 1051      |
| Medical Research Council                                                                                    | Ethics Committee for Clinical Pharmacology | Budapest Hungary         | 1051      |
| St. James's Hospita / AMNCH Research Ethics Committee                                                       |                                            | Tallaght, Dublin Ireland | Dublin 24 |
| St. James's Hospita / AMNCH Research Ethics Committee                                                       |                                            | Tallaght, Dublin Ireland | Dublin 24 |
| St. James's Hospita / AMNCH Research Ethics Committee                                                       |                                            | Tallaght, Dublin Ireland | Dublin 24 |
| St. James's Hospita / AMNCH Research Ethics Committee                                                       |                                            | Tallaght, Dublin Ireland | Dublin 24 |
| COMITATO ETICO REGIONE TOSCANA - AREA VASTA CENTRO c/o AZIENDA OSPEDALIERO-UNIVERSITARIA CAREGGI DI FIRENZE |                                            | FIRENZE (FI) ITALY       | 50134     |
| COMITATO ETICO CATANIA 1 - c/o A.O.U. POLICLINICO-VITTORIO EMANUELE DI CATANIA                              |                                            | CATANIA (CT) ITALY       | 95123     |
| COMITATO ETICO DELL'IRCCS S. RAFFAELE PISANA DI ROMA                                                        |                                            | ROMA (RM) ITALY          | 00166     |
| COMITATO ETICO CATANIA 1 - c/o A.O.U. POLICLINICO-VITTORIO EMANUELE DI CATANIA                              |                                            | CATANIA (CT) ITALY       | 95123     |

## CRYSTAL CID manuscript supplementary

|                                                                                                                                        |                               |
|----------------------------------------------------------------------------------------------------------------------------------------|-------------------------------|
| COMITATO ETICO PER LA SPERIMENTAZIONE CLINICA DELLA PROVINCIA DI VICENZA PRESSO ULSS 6 VICENZA                                         | VICENZA (VI) 36100<br>ITALY   |
| COMITATO ETICO DELLE AZIENDE SANITARIE DELL'UMBRIA - CEAS UMBRIA                                                                       | CORCIANO (PG) 06073<br>ITALY  |
| COMITATO ETICO PALERMO 1 c/o AOU POLICLINICO P. GIACCONE DI PALERMO                                                                    | PALERMO (PA) 90127<br>ITALY   |
| COMITATO ETICO REGIONALE (CER) DELLE MARCHE c/o AZIENDA OSPEDALIERA UNIVERSITARIA OSPEDALI RIUNITI UMBERTO I-LANCISIGM SALES DI ANCONA | ANCONA (AN) 60126<br>ITALY    |
| COMITATO ETICO PROVINCIALE DI VARESE c/o OSPEDALE DI CIRCOLO E FONDAZIONE MACCHI                                                       | VARESE (VA) 21100<br>ITALY    |
| COMITATO ETICO DELLA PROVINCIA DI MONZA BRIANZA c/o Ospedale San Gerardo                                                               | MONZA (MB) 20900<br>ITALY     |
| COMITATO ETICO DELLA PROVINCIA DI TREVISO E BELLUNO PRESSO AZIENDA ULSS 9 TREVISO                                                      | TREVISO (TV) 31100<br>ITALY   |
| COMITATO ETICO DELL'AZIENDA OSPEDALIERO UNIVERSITARIA S. LUIGI GONZAGA DI ORBASSANO                                                    | ORBASSANO (TO) 10043<br>ITALY |
| COMITATO ETICO IRST IRCCS AVR                                                                                                          | MELDOLA (FC) 47014<br>ITALY   |
| COMITATO REGIONE TOSCANA - AREA VASTA NORD OVEST c/o AZIENDA OSPEDALIERO UNIVERSITARIA PISANA DI PISA                                  | PISA (PI) 56126<br>ITALY      |
| COMITATO ETICO SECONDA UNIVERSITA' DEGLI STUDI DI NAPOLI - AOU SUN-AORN OSPEDALE DEI COLLI                                             | NAPOLI (NA) 80138<br>ITALY    |
| COMITATO ETICO CAMPANIA NORD c/o AZIENDA OSPEDALIERA 'S. GIUSEPPE MOSCATI' DI AVELLINO                                                 | AVELLINO (AV) 83100<br>ITALY  |
| COMITATO ETICO ASL 1 SASSARI                                                                                                           | SASSARI (SS) 07100<br>ITALY   |
| COMITATO ETICO DELLE AZIENDE SANITARIE DELL'UMBRIA - CEAS UMBRIA                                                                       | CORCIANO (PG) 06073<br>ITALY  |
| COMITATO ETICO CATANIA 2 c/o AZIENDA OSPEDALIERA DI RILIEVO                                                                            | CATANIA (CT) 95125<br>ITALY   |



## CRYSTAL CID manuscript supplementary

|                                                                                                                                                      |    |                                |
|------------------------------------------------------------------------------------------------------------------------------------------------------|----|--------------------------------|
| NAZIONALE E DI ALTA<br>SPECIALIZZAZIONE<br>GARIBALDI (AORNAS<br>GARIBALDI)                                                                           |    |                                |
| COMITATO ETICO REGIONE<br>TOSCANA - AREA VASTA<br>NORD OVEST c/o AZIENDA<br>OSPEDALIERO<br>UNIVERSITARIA PISANA DI<br>PISA                           | NA | PISA (PI) 56126<br>ITALY       |
| COMITATO ETICO<br>INDIPENDENTE DELL'IRCCS<br>ISTITUTO CLINICO<br>HUMANITAS                                                                           |    | ROZZANO (MI) 20089<br>ITALY    |
| COMITATO ETICO "OSPEDALI<br>RIUNITI" DI FOGGIA                                                                                                       |    | FOGGIA (FG) 71100<br>ITALY     |
| COMITATO ETICO DELLA<br>PROVINCIA DI BRESCIA c/o AO<br>Spedali Civili                                                                                |    | BRESCIA (BS) 25123<br>ITALY    |
| COMITATO ETICO<br>DELL'AZIENDA OSPEDALIERO<br>UNIVERSITARIA S. LUIGI<br>GONZAGA DI ORBASSANO                                                         |    | ORBASSANO (TO) 10043<br>ITALY  |
| COMITATO ETICO DELLA<br>PROVINCIA DI TREVISO E<br>BELLUNO PRESSO<br>AZIENDA ULSS 9 TREVISO                                                           |    | TREVISO (TV) 31100<br>ITALY    |
| COMITATO ETICO REGIONE<br>TOSCANA - AREA VASTA<br>CENTRO c/o AZIENDA<br>OSPEDALIERO-<br>UNIVERSITARIA CAREGGI DI<br>FIRENZE                          |    | FIRENZE (FI) 50134<br>ITALY    |
| COMITATO ETICO DELL'AOU<br>CONSORZIALE POLICLINICO<br>DI BARI                                                                                        |    | BARI (BA) 70124<br>ITALY       |
| COMITATO ETICO PALERMO 2<br>c/o AZIENDA OSPEDALIERA<br>OSPEDALI RIUNITI<br>VILLA SOFIA - CERVELLO                                                    |    | PALERMO (PA) 90146<br>ITALY    |
| COMITATO ETICO<br>DELL'UNIVERSITA' SAPIENZA                                                                                                          |    | ROMA (RM) 00161<br>ITALY       |
| COMITATO ETICO<br>DELL'AZIENDA SANITARIA<br>REGIONALE DEL MOLISE<br>(ASREM)                                                                          |    | CAMPOBASSO (CB) 86100<br>ITALY |
| COMITATO ETICO<br>DELL'UNIVERSITA' SAPIENZA                                                                                                          |    | ROMA (RM) 00161<br>ITALY       |
| COMITATO ETICO REGIONE<br>TOSCANA - AREA VASTA SUD<br>EST presso<br>AZIENDA OSPEDALIERA<br>UNIVERSITARIA SENESE DI<br>SIENA<br>c/o UOC Farmacia AOUS |    | SIENA (SI) 53100<br>ITALY      |
| COMITATO ETICO OSPEDALI<br>RIUNITI DI FOGGIA                                                                                                         |    | FOGGIA (FG) 71100<br>ITALY     |
| COMITATO ETICO DELLA<br>AUSL DI PIACENZA                                                                                                             |    | PIACENZA (PC) 29100<br>ITALY   |

## CRYSTAL CID manuscript supplementary

|                                                                                                                          |                              |
|--------------------------------------------------------------------------------------------------------------------------|------------------------------|
| COMITATO ETICO PER LA SPERIMENTAZIONE CLINICA DELLE PROVINCE DI VERONA E ROVIGO PRESSO AOUI VERONA<br>PIAZZALE LUDOVICO  | VERONA (VR) 37134<br>ITALY   |
| COMITATO ETICO DELLA PROVINCIA DI TREVISO E BELLUNO PRESSO AZIENDA ULSS 9 TREVISO                                        | TREVISO (TV) 31100<br>ITALY  |
| COMITATO ETICO ASL 1 SASSARI                                                                                             | SASSARI (SS) 07100<br>ITALY  |
| COMITATO ETICO DELL'AOU CONSORZIALE POLICLINICO DI BARI                                                                  | BARI (BA) 70124<br>ITALY     |
| COMITATO ETICO DELLA PROVINCIA DI BERGAMO c/o AO Papa Giovanni XXIII                                                     | BERGAMO (BG) 24127<br>ITALY  |
| COMITATO REGIONE TOSCANA - AREA VASTA NORD OVEST c/o AZIENDA OSPEDALIERO UNIVERSITARIA PISANA DI PISA                    | PISA (PI) 56126<br>ITALY     |
| COMITATO ETICO PALERMO 2 c/o AZIENDA OSPEDALIERA OSPEDALI RIUNITI VILLA SOFIA - CERVELLO                                 | PALERMO (PA) 90146<br>ITALY  |
| COMITATO ETICO PER LA SPERIMENTAZIONE CLINICA DELLA PROVINCIA DI VICENZA PRESSO ULSS 6 VICENZA                           | VICENZA (VI) 36100<br>ITALY  |
| COMITATO INDIPENDENTE DI ETICA MEDICA ASL BR                                                                             | BRINDISI (BR) 72100<br>ITALY |
| COMITATO ETICO IRCCS PASCALE                                                                                             | NAPOLI (NA) 80131<br>ITALY   |
| COMITATO ETICO CAMPANIA NORD c/o AZIENDA OSPEDALIERA 'S. GIUSEPPE MOSCATI' DI AVELLINO                                   | AVELLINO (AV) 83100<br>ITALY |
| COMITATO ETICO REGIONALE DELLA LIGURIA c/o IRCCS AOU SAN MARTINO - IST ISTITUTO NAZIONALE PER LA RICERCA SUL CANCRO      | GENOVA (GE) 16132<br>ITALY   |
| COMITATO ETICO INTERAZIENDALE ASO S. CROCE E CARLE - AA.SS.LL. CN1, CN2 E AT                                             | CUNEO (CN) 12100<br>ITALY    |
| COMITATO ETICO DELL'AOU CONSORZIALE POLICLINICO DI BARI                                                                  | BARI (BA) 70124<br>ITALY     |
| COMITATO ETICO CENTRALE IRCCS LAZIO - Sezione IFO-FONDAZIONE BIETTI c/o IRCCS ISTITUTI FISIOTERAPICI OSPITALIERI DI ROMA | ROMA (RM) 00144<br>ITALY     |



## CRYSTAL CID manuscript supplementary

|                                                                                                               |             |                               |
|---------------------------------------------------------------------------------------------------------------|-------------|-------------------------------|
| The Ethics Committee for Clinical Research at Pauls Stradins Clinical University Hospital Development Society |             | Riga LV- 1002<br>Latvia       |
| Lithuanian Bioethics Committee                                                                                |             | Vilnius LT-01402<br>Lithuania |
| Lithuanian Bioethics Committee                                                                                |             | Vilnius LT-01402<br>Lithuania |
| Lithuanian Bioethics Committee                                                                                |             | Vilnius LT-01402<br>Lithuania |
| Lithuanian Bioethics Committee                                                                                |             | Vilnius LT-01402<br>Lithuania |
| Lithuanian Bioethics Committee                                                                                |             | Vilnius LT-01402<br>Lithuania |
| Lithuanian Bioethics Committee                                                                                |             | Vilnius LT-01402<br>Lithuania |
| Lithuanian Bioethics Committee                                                                                |             | Vilnius LT-01402<br>Lithuania |
| Lithuanian Bioethics Committee                                                                                |             | Vilnius LT-01402<br>Lithuania |
| Lithuanian Bioethics Committee                                                                                |             | Vilnius LT-01402<br>Lithuania |
| REK Regionale Komiteer for medisinsk og helsefaglig forskningsetikk                                           | REK Sør-Øst | Oslo Oslo 0484<br>Norway      |
| REK Regionale Komiteer for medisinsk og helsefaglig forskningsetikk                                           | REK Sør-Øst | Oslo Oslo 0484<br>Norway      |
| REK Regionale Komiteer for medisinsk og helsefaglig forskningsetikk                                           | REK Sør-Øst | Oslo Oslo 0484<br>Norway      |
| REK Regionale Komiteer for medisinsk og helsefaglig forskningsetikk                                           | REK Sør-Øst | Oslo Oslo 0484<br>Norway      |
| REK Regionale Komiteer for medisinsk og helsefaglig forskningsetikk                                           | REK Sør-Øst | Oslo Oslo 0484<br>Norway      |
| REK Regionale Komiteer for medisinsk og helsefaglig forskningsetikk                                           | REK Sør-Øst | Oslo Oslo 0484<br>Norway      |
| REK Regionale Komiteer for medisinsk og helsefaglig forskningsetikk                                           | REK Sør-Øst | Oslo Oslo 0484<br>Norway      |
| REK Regionale Komiteer for medisinsk og helsefaglig forskningsetikk                                           | REK Sør-Øst | Oslo Oslo 0484<br>Norway      |
| REK Regionale Komiteer for medisinsk og helsefaglig forskningsetikk                                           | REK Sør-Øst | Oslo Oslo 0484<br>Norway      |
| Komisja Bioetyczna przy Instytucie Gruźlicy i Chorob Płuc                                                     |             | Warszawa 01-138<br>Poland     |

## CRYSTAL CID manuscript supplementary

|                                                                                   |                            |                             |
|-----------------------------------------------------------------------------------|----------------------------|-----------------------------|
| Komisja Bioetyczna<br>przy Instytucie Gruzlicy i Chorob<br>Pluc                   |                            | Warszawa 01-138<br>Poland   |
| Komisja Bioetyczna<br>przy Instytucie Gruzlicy i Chorob<br>Pluc                   |                            | Warszawa 01-138<br>Poland   |
| Komisja Bioetyczna<br>przy Instytucie Gruzlicy i Chorob<br>Pluc                   |                            | Warszawa 01-138<br>Poland   |
| Komisja Bioetyczna<br>przy Instytucie Gruzlicy i Chorob<br>Pluc                   |                            | Warszawa 01-138<br>Poland   |
| Komisja Bioetyczna<br>przy Instytucie Gruzlicy i Chorob<br>Pluc                   |                            | Warszawa 01-138<br>Poland   |
| Komisja Bioetyczna<br>przy Instytucie Gruzlicy i Chorob<br>Pluc                   |                            | Warszawa 01-138<br>Poland   |
| Komisja Bioetyczna<br>przy Instytucie Gruzlicy i Chorob<br>Pluc                   |                            | Warszawa 01-138<br>Poland   |
| Comissão de Ética para a<br>Investigação Clínica (CEIC)                           |                            | Lisboa 1749-004<br>Portugal |
| Comissão de Ética para a<br>Investigação Clínica (CEIC)                           |                            | Lisboa 1749-004<br>Portugal |
| Comissão de Ética para a<br>Investigação Clínica (CEIC)                           |                            | Lisboa 1749-004<br>Portugal |
| Comissão de Ética para a<br>Investigação Clínica (CEIC)                           |                            | Lisboa 1749-004<br>Portugal |
| Comissão de Ética para a<br>Investigação Clínica (CEIC)                           |                            | Lisboa 1749-004<br>Portugal |
| Comissão de Ética para a<br>Investigação Clínica (CEIC)                           |                            | Lisboa 1749-004<br>Portugal |
| Comissão de Ética para a<br>Investigação Clínica (CEIC)                           |                            | Lisboa 1749-004<br>Portugal |
| Comissão de Ética para a<br>Investigação Clínica (CEIC)                           |                            | Lisboa 1749-004<br>Portugal |
| Comisia Nationala de Bioetica a<br>Medicamentului si a<br>Dispozitivelor Medicale | Departament Studii Clinice | Bucuresti 020125<br>Romania |



## CRYSTAL CID manuscript supplementary

|                                                                                                                                                                              |                            |                                                                    |
|------------------------------------------------------------------------------------------------------------------------------------------------------------------------------|----------------------------|--------------------------------------------------------------------|
| Comisia Nationala de Bioetica a Medicamentului si a Dispozitivelor Medicale                                                                                                  | Departament Studii Clinice | Bucuresti 020125<br>Romania                                        |
| Comisia Nationala de Bioetica a Medicamentului si a Dispozitivelor Medicale                                                                                                  | Departament Studii Clinice | Bucuresti 020125<br>Romania                                        |
| Comisia Nationala de Bioetica a Medicamentului si a Dispozitivelor Medicale                                                                                                  | Departament Studii Clinice | Bucuresti 020125<br>Romania                                        |
| Comisia Nationala de Bioetica a Medicamentului si a Dispozitivelor Medicale                                                                                                  | Departament Studii Clinice | Bucuresti 020125<br>Romania                                        |
| Comisia Nationala de Bioetica a Medicamentului si a Dispozitivelor Medicale                                                                                                  | Departament Studii Clinice | Bucuresti 020125<br>Romania                                        |
| Comisia Nationala de Bioetica a Medicamentului si a Dispozitivelor Medicale                                                                                                  | Departament Studii Clinice | Bucuresti 020125<br>Romania                                        |
| Comisia Nationala de Bioetica a Medicamentului si a Dispozitivelor Medicale                                                                                                  | Departament Studii Clinice | Bucuresti 020125<br>Romania                                        |
| Local Ethics Committee of GBOU VPO Satatov State Medical University named by Razumovskiy of Ministry of Health of Russian Federation                                         | IRB Department             | Saratov (137, Bolshaya Sadovaya str.) 410054<br>Russian Federation |
| United LEC of Federal State Budgetary Institution "Research Institute for Complex Issues of Cardiovascular Diseases"                                                         | IRB department             | 6, Sosnoviy blvd,<br>Kemerovo 650002<br>Russian Federation         |
| Local Ethics Committee of State Budget Educational Institution of Higher Professional Education "Kazan State Medical University" of Ministry of Health of Russian Federation | IRB Department             | Kazan' (49, Butlerova str.)<br>420012<br>Russian Federation        |
| Local ethics committee of Bashkir state medical university                                                                                                                   | IRB department             | Ufa Lenina str. 3, 450077<br>Russian Federation                    |
| Local ethics committee of Bashkir state medical university                                                                                                                   | IRB department             | Ufa Lenina str. 3, 450077<br>Russian Federation                    |
| Local Ethics Committee of Regional Clinical Hospital #4                                                                                                                      | EC Department              | Chelyabinsk (81, Ostrovskogo str.)<br>Russian Federation           |
| LEC of First Pavlov State Medical University of Saint-Petersburg                                                                                                             | IRB department             | street Rentgena 10, Saint-Petersburg, 197022<br>Russian Federation |
| Ethic Committee of I.M.Sechenov First Moscow State Medical University                                                                                                        | EC Department              | Moscow, Trubetskaya str., 8,<br>bd.2 119048<br>Russian Federation  |

## CRYSTAL CID manuscript supplementary

|                                                                                                                                                                                   |                |                                                                       |
|-----------------------------------------------------------------------------------------------------------------------------------------------------------------------------------|----------------|-----------------------------------------------------------------------|
| Ethics Committee of State Clinical Hospital for Emergency Medical Care n.a. N.V. Solovyev of Yaroslavl Region                                                                     | EC Department  | Yaroslavl, street Zagorodny sad, 11 150003<br>Russian Federation      |
| Ethics Committee of State Budgetary Educational Institution of Higher Professional Education 'Smolensk State Medical Academy' of Ministry of Healthcare of the Russian Federation | IRB Department | Smolensk (81, Krupskoy str.) 214019<br>Russian Federation             |
| Expert council concerning medical ethics of RMAPO                                                                                                                                 | IRB department | Moscow Barrikadnaya str., 2, bld. 1 123995<br>Russian Federation      |
| Ethics Committee of Siberian State Medical University                                                                                                                             | IRB department | Tomsk, Moskovskiy tract 2g 634050<br>Russian Federation               |
| LEC of First Pavlov State Medical University of Saint-Petersburg                                                                                                                  | IRB department | street Rentgena 10, Saint-Petersburg, 197022<br>Russian Federation    |
| Local Ethics Committee of LLC "Reafan"                                                                                                                                            | EC Department  | Novosibirsk (14, Yadrimtsevszkaya str.), 630099<br>Russian Federation |
| LEC of First Pavlov State Medical University of Saint-Petersburg                                                                                                                  | IRB department | street Rentgena 10, Saint-Petersburg, 197022<br>Russian Federation    |
| Local ethics committee at the Ryazan State Medical University                                                                                                                     | EC Department  | Ryazan, Vysokovoltnaya str, . 9 390026<br>Russian Federation          |
| LEC of The State Budgetary Institution of Healthcare of Nizhny Novgorod Region "Nizhny Novgorod Regional Hospital named after N.A. Semashko"                                      | EC Department  | Nizhny Novgorod, 603126<br>Russian Federation                         |
| Etická komisia pri NsP svJakuba,                                                                                                                                                  |                | Bardejov Slovakia 085 01<br>Slovakia                                  |
| Etická komisia Prešovského samosprávneho kraja                                                                                                                                    |                | Prešov Slovakia 080 01<br>Slovakia                                    |
| Etická komisia Žilinského samosprávneho kraja                                                                                                                                     |                | Žilina Slovakia 011 09<br>Slovakia                                    |
| Etická komisia Nitrianskeho samosprávneho kraja                                                                                                                                   |                | Nitra Slovakia 949 01<br>Slovakia                                     |
| Etická komisia Nitrianskeho samosprávneho kraja                                                                                                                                   |                | Nitra Slovakia 949 01<br>Slovakia                                     |
| Etická komisia Nitrianskeho samosprávneho kraja                                                                                                                                   |                | Nitra Slovakia 949 01<br>Slovakia                                     |
| Etická komisia Prešovského samosprávneho kraja                                                                                                                                    |                | Prešov Slovakia 080 01<br>Slovakia                                    |
| Etická komisia Nitrianskeho samosprávneho kraja                                                                                                                                   |                | Nitra Slovakia 949 01<br>Slovakia                                     |
| Etická komisia Trenčiansky samosprávny kraja                                                                                                                                      |                | Trenčím Slovakia 911 01<br>Slovakia                                   |

## CRYSTAL CID manuscript supplementary

|                                                                                     |                                      |                                               |
|-------------------------------------------------------------------------------------|--------------------------------------|-----------------------------------------------|
| Etická komisia Žilinského samosprávneho kraja                                       |                                      | Žilina Slovakia 011 09 Slovakia               |
| Etická komisia Prešovského samosprávneho kraja                                      |                                      | Prešov Slovakia 949 01 Slovakia               |
| Etická komisia Trnavského samosprávneho kraja                                       |                                      | Trnava Slovakia 917 01 Slovakia               |
| Etická komisia Prešovského samosprávneho kraja                                      |                                      | Prešov Slovakia 080 01 Slovakia               |
| Etická komisia Košického samosprávneho kraja                                        |                                      | Košice Slovakia 040 01 Slovakia               |
| The Republic of Slovenia National Medical Ethics Committee                          |                                      | Ljubljana SI1000 Slovenia                     |
| The Republic of Slovenia National Medical Ethics Committee                          |                                      | Ljubljana SI1000 Slovenia                     |
| The Republic of Slovenia National Medical Ethics Committee                          |                                      | Ljubljana SI1000 Slovenia                     |
| The Republic of Slovenia National Medical Ethics Committee                          |                                      | Ljubljana SI1000 Slovenia                     |
| CEIC Hospital Universitari i Politècnic La Fe                                       |                                      | Valencia Valencia 46026 Spain                 |
| CEIC Hospital La Ribera de Alzira                                                   |                                      | Alzira Valencia 46600 Spain                   |
| CEI Área Costa del Sol                                                              |                                      | Marbella Málaga 29603 Spain                   |
| CEIC Fundació Investigació en Atenció Primària Jordi Gol i Gurina - IDIAP Jordi Gol |                                      | Barcelona Barcelona 08007 Spain               |
| CEIC Fundació Jordi Gol i Gurina                                                    | Secretaria del CEIC/ IDIAP Jordi Gol | Barcelona Barcelona 08007 Spain               |
| CEIC Fundació Unió Catalana de Hospitals                                            |                                      | Barcelona Barcelona 08009 Spain               |
| CEIC Fundació Sant Joan de Déu                                                      |                                      | Esplugues del Llobregat Barcelona 08950 Spain |
| CEIC Fundació d'Osona per la Recerca i l'Educació Sanitàries                        | Secretaria del CEIC                  | Vic Barcelona 08500 Spain                     |
| CEIC Fundació Unió Catalana de Hospitals                                            |                                      | Barcelona Barcelona 08009 Spain               |
| CEIC/CEIm Institut d'Investigació i Innovació Parc Taulí                            |                                      | Sabadell Barcelona 08208 Spain                |
| CEIC Hospital Fundación Jiménez Díaz                                                |                                      | Madrid Madrid 28040 Spain                     |
| Comité Autonómico de Ética de la Investigación de Galicia                           |                                      | Santiago de Compostela A Coruña 15781 Spain   |



## CRYSTAL CID manuscript supplementary

|                                                          |                                          |                                 |
|----------------------------------------------------------|------------------------------------------|---------------------------------|
| CEIC Hospital Clinic de Barcelona                        |                                          | Barcelona Barcelona 08036 Spain |
| CEIC Complejo Hospitalario de Cáceres                    |                                          | Cáceres Cáceres 10004 Spain     |
| CEIC Consorci Sanitari del Maresme                       |                                          | Mataró Barcelona 08304 Spain    |
| CEIC del Hospital Infanta Cristina de Badajoz            |                                          | Badajoz Badajoz 06005 Spain     |
| CEIC Fundación Jiménez Díaz                              | Instituto de Investigación Sanitaria-FJD | Madrid 28040 Spain              |
| CEIC Hospital Arnau de Vilanova de Valencia              |                                          | València València 46015 Spain   |
| CEIC Área de Salud de León                               |                                          | Ponferrada León 24071 Spain     |
| CEIC Área 4 - Hospital Universitario Ramón y Cajal       |                                          | Madrid Madrid 28034 Spain       |
| CEIC Hospital Universtari Dr. Peset                      |                                          | València València 46017 Spain   |
| CEIC de Aragón                                           | Secretaria del CEIC                      | Zaragoza Zaragoza 50009 Spain   |
| CEIC Hospital Universitari i Politècnic La Fe            |                                          | Valencia Valencia 46026 Spain   |
| CEIC Área 11 - Hospital 12 de Octubre                    |                                          | Madrid Madrid 28041 Spain       |
| Comité de Ética de la Investigación de las Illes Balears |                                          | Palma Illes Balears 07010 Spain |
| CEI de Granada                                           |                                          | Motril Granada 18600 Spain      |
| CEI Provincial de Málaga                                 |                                          | Málaga Málaga 29010 Spain       |
| CEI de Córdoba                                           |                                          | Córdoba Córdoba 14004 Spain     |
| CEIC Area de Salud de Salamanca                          |                                          | Salamanca Salamanca 37007 Spain |
| CEIC de la Vall d'Hebron                                 | Institut Recerca HUVH                    | Barcelona Barcelona 08035 Spain |
| Comité de Ética de la Investigación de las Illes Balears |                                          | Palma Illes Balears 07010 Spain |
| CEIC Consorcio Hospital General de Valencia              |                                          | Valencia Valencia 46014 Spain   |
| CEIC Hospital Fundación Jiménez Díaz                     |                                          | Madrid Madrid 28040 Spain       |
| CEIC Hospital Clínica Benidorm                           |                                          | Benidorm Alicante 03501 Spain   |
| CEIC Hospital de Sagunto I CE                            |                                          | Sagunto Valencia 46520 Spain    |
| Regionala etikprövningsnämnden i Lund                    |                                          | Lund Lund 223 50 Sweden         |
| Regionala etikprövningsnämnden i Lund                    |                                          | Lund Lund 223 50 Sweden         |
